# Supplementary material
Source: Springer Nature journal article supplement (https://cris.unibo.it/retrieve/8a5ea5a5-aac7-4e95-9877-8fdd4a36cd02/Supplementary%20information.zip)
Supplement: MOESM1 [file 10552_2026_2132_MOESM1_ESM.pdf › 10552_2026_2132_MOESM1_ESM.pdf]

| "Newcastle-Ottawa Scale" (NOS) APPLICATION                                                                                                                                   |                                                         |                                                                                                                                       |                                                         |                                                               |
|------------------------------------------------------------------------------------------------------------------------------------------------------------------------------|---------------------------------------------------------|---------------------------------------------------------------------------------------------------------------------------------------|---------------------------------------------------------|---------------------------------------------------------------|
| Note: A study can be awarded a maximum of one star for each numbered item within the Selection and Outcome categories. A maximum of two stars can be given for Comparability |                                                         |                                                                                                                                       |                                                         |                                                               |
| Selection                                                                                                                                                                    | 1pt                                                     |                                                                                                                                       | 0pt                                                     |                                                               |
| Q1) Representativeness of the exposed cohort                                                                                                                                 | a) truly representative of the average in the community | b) somewhat representative of the average in the community                                                                            | c) selected group of users eg nurses, volunteers        | d) no description of the derivation of the cohort             |
| Q2) Selection of the non exposed cohort                                                                                                                                      | a) drawn from the same community as the exposed cohort  |                                                                                                                                       | b) drawn from a different source                        | c) no description of the derivation of the non exposed cohort |
| Q3) Ascertainment of exposure                                                                                                                                                | a) secure record                                        | b) structured interview                                                                                                               | c) written self report                                  | d) no description                                             |
| Q4) Demonstration that outcome of interest was not present at start of study                                                                                                 | a) yes                                                  |                                                                                                                                       | b) no                                                   |                                                               |
| Comparability                                                                                                                                                                | 1pt                                                     |                                                                                                                                       | 0pt                                                     |                                                               |
| Q1) Comparability of cohorts on the basis of the design or analysis                                                                                                          | a) study controls for                                   |                                                                                                                                       | b) study controls for any additional factor             |                                                               |
| Outcome                                                                                                                                                                      | 1pt                                                     |                                                                                                                                       | 0pt                                                     |                                                               |
| Q1) Assessment of outcome                                                                                                                                                    | a) independent blind assessment                         | b) record linkage Ø                                                                                                                   | c) self report                                          | d) no description                                             |
| Q2) Was follow-up long enough for outcomes to occur                                                                                                                          | a) yes                                                  |                                                                                                                                       | b) no                                                   |                                                               |
| Q3) Adequacy of follow up of cohorts                                                                                                                                         | a) complete follow up - all subjects accounted for      | b) subjects lost to follow up unlikely to introduce bias - small number lost - >80 % follow up, or description provided of those lost | c) follow up rate < 80%and no description of those lost | d) no statement                                               |
| Appendix 1 * NOS APPLICATION FILTERING.                                                                                                                                      |                                                         |                                                                                                                                       |                                                         |                                                               |
